# Supplementary material for: Cracked monolayer 1T MoS2with abundant active sites for enhanced electrocatalytic hydrogen evolution
Source: Royal Society of Chemistry journal article supplement (doi:10.1039/c6cy02649d), 2017-01-01
Supplement: c6cy02649d1.pdf [file c6cy02649d1.pdf]

## Supplementary data

### **Cracked monolayer 1T MoS<sub>2</sub> with Abundant Active Sites for Enhanced Electrocatalytic Hydrogen Evolution**

Yue Li<sup>1\*§</sup>, Longlu Wang<sup>2§</sup>, Shuqu Zhang<sup>2</sup>, Xueru Dong<sup>1</sup>, Yuze Song<sup>1</sup>, Tao Cai<sup>3</sup>,  
Yutang Liu<sup>3\*</sup>

<sup>1</sup>School of Materials and Chemical Engineering, Henan Institute of Engineering,  
Zhengzhou, Henan 451191, P. R. China

<sup>2</sup>State Key Laboratory of Chemo/Biosensing and Chemometrics, Hunan University,  
Changsha 410082, P. R. China

<sup>3</sup>College of Environmental Science and Engineering, Hunan University, Changsha  
410082, P. R. China

\*Y. Li, Tel.: +86 0371-67718909. Fax: +86 0371-67718909. E-mail address:  
liyue0128@163.com

\*Y.T. Liu, Tel.: +86 0731-88821429. Fax: +86 0731-88821429. E-mail address:  
yt\_liu@hnu.edu.cn.

§Y. Li and L.L. Wang contributed equally to this work.

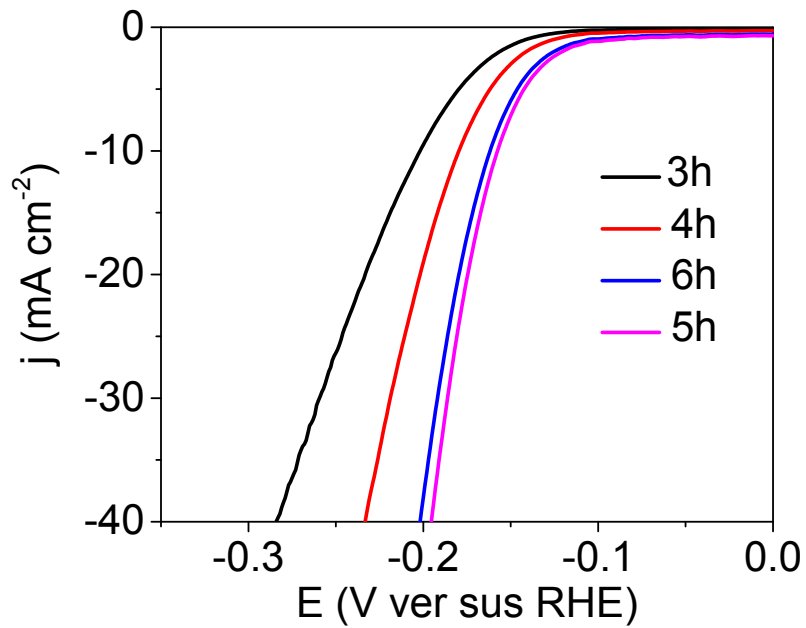

**Fig. S1** Polarization curves of C-1T MoS<sub>2</sub> samples prepared under different sonication time: 3 h, 4 h, 5 h, and 6 h.

From this figure, we can see that the sonication time can great influence on the HER performance. The overpotential at a current density of 10 mA cm<sup>-2</sup> decreases first and then increases with prolonging sonication time. The maximum overpotential vs reversible hydrogen electrode was achieved on 5 h sonication time.

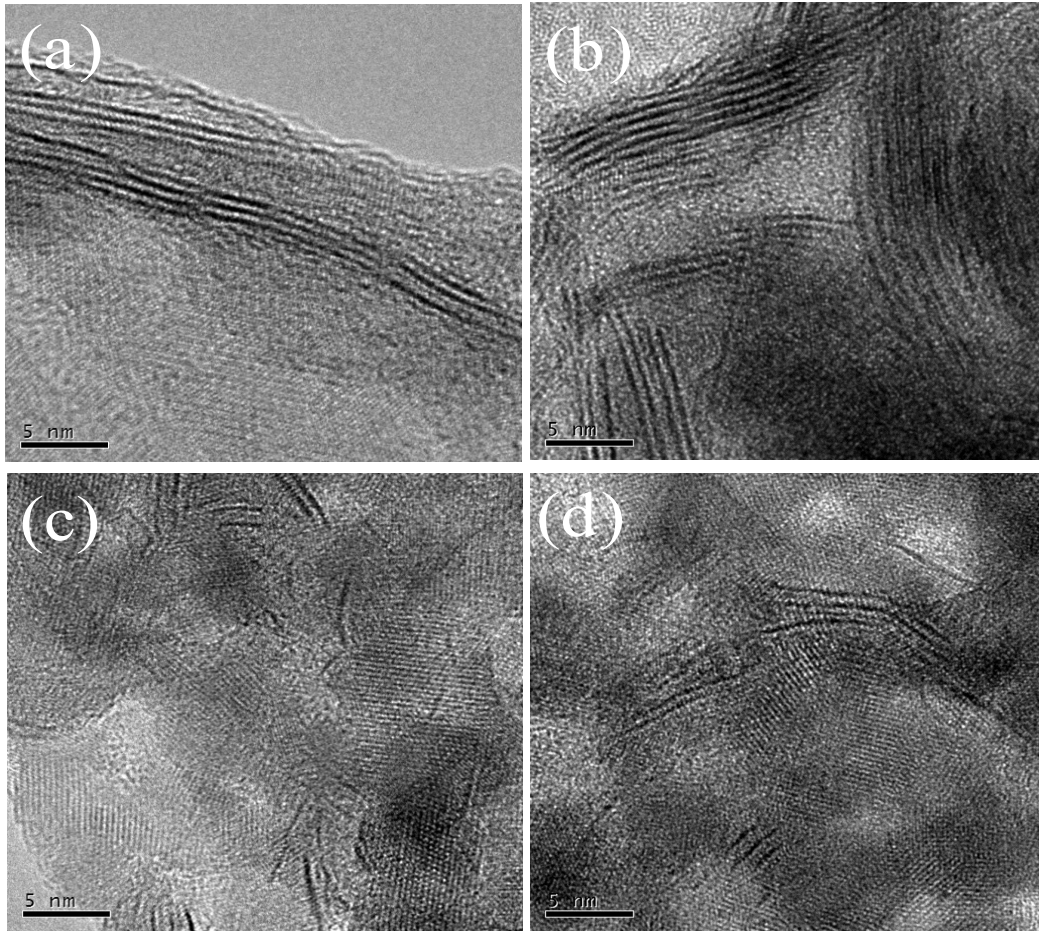

**Fig. S2** Additional TEM and HRTEM images of 2H MoS<sub>2</sub> nanosheets (a-b) and C-1T MoS<sub>2</sub> nanosheets (c-d).

Fig. S2a and b reveals the layer of hydrothermal synthesis MoS<sub>2</sub> nanosheets is 3-7 layers, and the edge of the nanosheets is long and continuous. However, after exfoliating the 2H MoS<sub>2</sub> nanosheets, the entire nanosheets was created into some monolayer smaller nanosheets as shown in Fig. S2c and d. As we can see, the edge of C-1T MoS<sub>2</sub> is shortened and discontinuous, confirming the C-1T MoS<sub>2</sub> is consisted of some MoS<sub>2</sub> pieces.

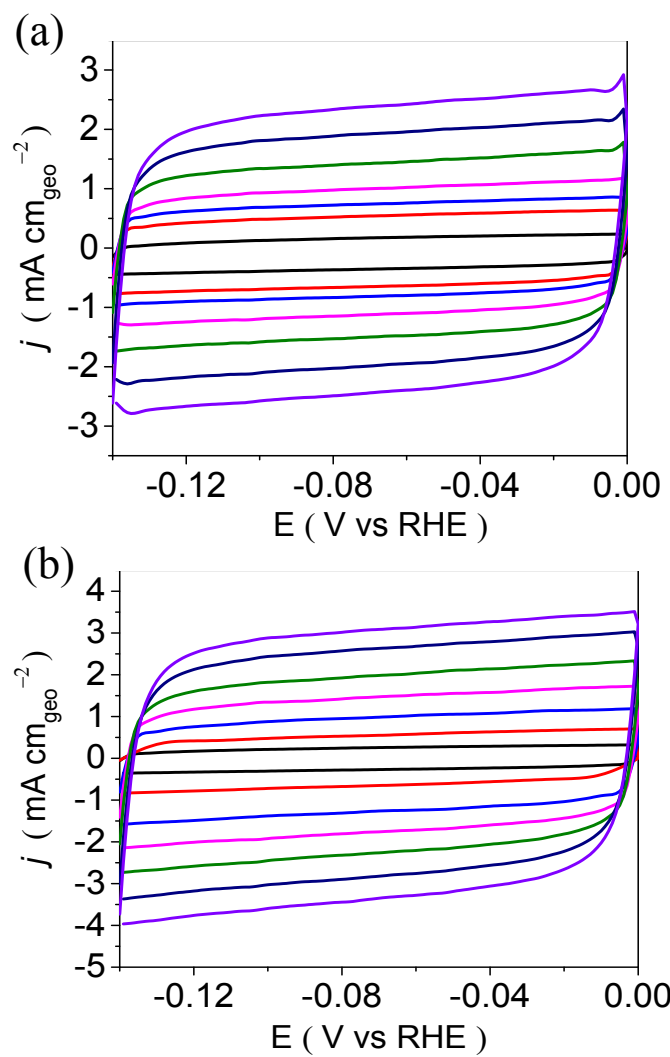

**Fig. S3** CV curves in the region of 0.0-0.14 V (V vs RHE) for 2H MoS<sub>2</sub> nanosheets (a) and C-1T MoS<sub>2</sub> nanosheets (b).

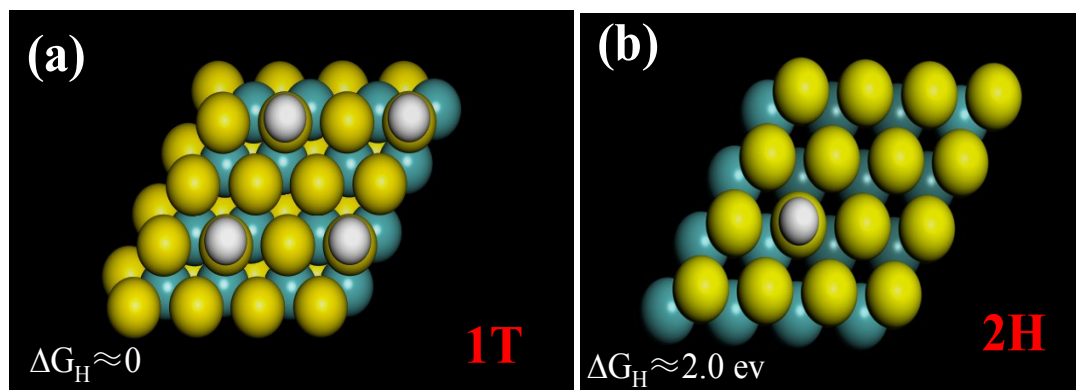

**Fig. S4** Gibbs free energy of adsorbed hydrogen ( $\Delta G_H$ ) for (a) 2H MoS<sub>2</sub> basal plane, and (b) 1T MoS<sub>2</sub> basal plane with around 12.5%~25% H coverage. Blue, yellow and white balls indicate Mo, S and H atoms, respectively.

According to the recent reported calculations by Jiang's group, the  $\Delta G_H$  is between  $-0.28$  and  $0.13$  eV at the 1T MoS<sub>2</sub> basal plane with around 12.5%~25% H coverage, while the  $\Delta G_H$  value is about 2.0 eV for 2H MoS<sub>2</sub> basal plane. As we know, the optimal HER catalysts have hydrogen adsorption energies is close to zero ( $\Delta G_H \approx 0$ ), or the binding hydrogen energy is neither too weakly nor too strongly. Fig. S4a shows the model of 1T MoS<sub>2</sub> basal plane with around 25% H coverage. Fig. S4b shows only one hydrogen adsorbed on the 2H MoS<sub>2</sub> basal plane because higher  $\Delta G_H$  makes the protons bonded too weakly to the catalyst surface, thereby leading to a slower HER kinetics.

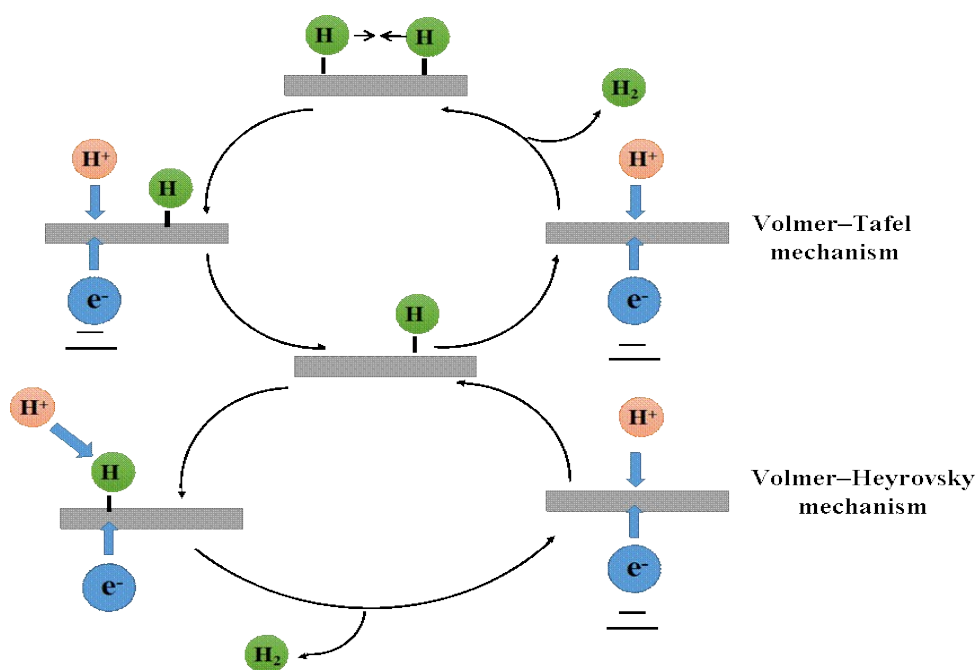

**Fig. S5** The mechanism of hydrogen evolution on the surface of an electrode in acidic solutions.

**Table S1.** Comparison of representative MoS<sub>2</sub> or MoS<sub>2</sub>-based catalytic parameters

recently.

| Photocatalysts                                 | Onset overpotential [mV] | Tafel slopes [mV decade <sup>-1</sup> ] | $\eta@j = 10 \text{ mA cm}^{-2}$ [mV] | Ref.      |
|------------------------------------------------|--------------------------|-----------------------------------------|---------------------------------------|-----------|
| C-1T MoS <sub>2</sub>                          | 113                      | 42.7                                    | 156                                   | this work |
| 2H MoS <sub>2</sub>                            | 161                      | 75.3                                    | 274                                   | this work |
| Defect-rich/MoS <sub>2</sub>                   | 120                      | 50                                      | 195                                   | 1         |
| 1T-MoS <sub>2</sub>                            | 135                      | 43                                      | 187                                   | 2         |
| O-MoS <sub>2</sub>                             | 120                      | 55                                      | N/A                                   | 3         |
| MoS <sub>2</sub> -NR/rGO                       | N/A                      | 46                                      | N/A-                                  | 4         |
| hierarchical MoS <sub>2</sub>                  | 50                       | 60                                      | 167                                   | 5         |
| O-MoS <sub>2</sub>                             | 120                      | 58                                      | N/A-                                  | 6         |
| O-MoS <sub>2</sub> /G                          | 120                      | 51                                      | N/A-                                  | 6         |
| plasma exposed MoS <sub>2</sub>                | 300                      | 117                                     | N/A                                   | 7         |
| MoS <sub>2</sub> nanodots                      | 90                       | 61                                      | 248                                   | 8         |
| MoS <sub>2</sub> dots/Au                       | 190                      | 74                                      | N/A-                                  | 9         |
| P-1T MoS <sub>2</sub>                          | N/A                      | 43                                      | 153                                   | 10        |
| MoS <sub>2</sub> hollow spheres                | 112                      | 74                                      | 214                                   | 11        |
| edge-terminated MoS <sub>2</sub>               | 103                      | 49                                      | 149                                   | 12        |
| 1T@2H-MoS <sub>2</sub>                         | 42                       | 49                                      | 64                                    | 13        |
| CoS <sub>2</sub> /MoS <sub>2</sub> /CC         | N/A                      | 66                                      | 177                                   | 14        |
| micro and ground microflakes -MoS <sub>2</sub> | N/A                      | 60-70                                   | 174                                   | 15        |
| MoS <sub>2</sub> /Graphene                     | 30                       | 67.4                                    | 110                                   | 16        |
| Hollow MoS <sub>2</sub>                        | N/A                      | 48                                      | 202                                   | 17        |
| C/MoS <sub>2</sub> @G                          | 165                      | 46                                      | N/A                                   | 18        |
| Laser MoS <sub>2</sub> /carbon                 | N/A                      | 64                                      | 216                                   | 19        |
| DR-MoS <sub>2</sub>                            | 166                      | 66                                      | 208                                   | 20        |

## References

1. J. Xie, H. Zhang, S. Li, R. Wang, X. Sun, M. Zhou, J. Zhou, X. W. D. Lou and Y. Xie, *Advanced Materials*, 2013, **25**, 5807-5813.
2. M. A. Lukowski, A. S. Daniel, F. Meng, A. Forticaux, L. Li and S. Jin, *Journal of the American Chemical Society*, 2013, **135**, 10274-10277.
3. J. Xie, J. Zhang, S. Li, F. Grote, X. Zhang, H. Zhang, R. Wang, Y. Lei, B. Pan and Y. Xie, *Journal of the American Chemical Society*, 2013, **135**, 17881-17888.
4. Y. Zhao, L. Kuai, Y. Liu, P. Wang, H. Arandiyani, S. Cao, J. Zhang, F. Li, Q. Wang, B. Geng and H. Sun, *Scientific Reports*, 2015, **5**, 8722.
5. J. Zhang, S. Liu, H. Liang, R. Dong and X. Feng, *Advanced Materials*, 2015, **27**, 7426-7431.
6. J. Guo, F. Li, Y. Sun, X. Zhang and L. Tang, *Journal of Power Sources*, 2015, **291**, 195-200.
7. G. Ye, Y. Gong, J. Lin, B. Li, Y. He, S. T. Pantelides, W. Zhou, R. Vajtai and P. M. Ajayan, *Nano letters*, 2016, **16**, 1097-1103.
8. J. Benson, M. Li, S. Wang, P. Wang and P. Papakonstantinou, *ACS applied materials & interfaces*, 2015, **7**, 14113-14122.
9. D. Gopalakrishnan, D. Damien and M. M. Shaijumon, *ACS nano*, 2014, **8**, 5297-5303.
10. Y. Yin, J. Han, Y. Zhang, X. Zhang, P. Xu, Q. Yuan, L. Samad, X. Wang, Y. Wang and Z. Zhang, *Journal of the American Chemical Society*, 2016, **5**, 7965-7972.
11. B. Guo, K. Yu, H. Li, H. Song, Y. Zhang, X. Lei, H. Fu, Y. Tan and Z. Zhu, *ACS applied materials & interfaces*, 2016, **8**, 5517-5525.
12. M.-R. Gao, M. K. Y. Chan and Y. Sun, *Nat Commun*, 2015, **6**, 7493.
13. S. Shi, D. Gao, B. Xia, P. Liu and D. Xue, *Journal of Materials Chemistry A*, 2015, **3**, 24414-24421.
14. C. Su, J. Xiang, F. Wen, L. Song, C. Mu, D. Xu, C. Hao and Z. Liu,



- Electrochimica Acta*, 2016, **212**, 941-949.
15. D. Kiriya, P. Lobaccaro, H. Y. Y. Nyein, P. Taheri, M. Hettick, H. Shiraki, C. M. Sutter-Fella, P. Zhao, W. Gao and R. Maboudian, *Nano letters*, 2016, **16**, 4047–4053.
  16. L. Ma, Y. Hu, G. Zhu, R. Chen, T. Chen, H. Lu, Y. Wang, J. Liang, H. Liu, C. Yan, Z. Tie, Z. Jin and J. Liu, *Chemistry of Materials*, 2016, DOI: 10.1021/acs.chemmater.6b01980.
  17. A. Ambrosi and M. Pumera, *Acs Catalysis*, 2016, **6**, 3985-3993.
  18. Y. Li, J. Wang, X. Tian, L. Ma, C. Dai, C. Yang and Z. Zhou, *Nanoscale*, 2016, **8**, 1676-1683.
  19. H. Deng, C. Zhang, Y. Xie, T. Tumlin, L. Giri, S. P. Karna and J. Lin, *Journal of Materials Chemistry A*, 2016, **4**, 6824-6830.
  20. K. Qi, S. Yu, Q. Wang, W. Zhang, J. Fan, W. Zheng and X. Cui, *Journal of Materials Chemistry A*, 2016, **4**, 4025-4031.
